# Supplementary material
Source: PubMed Central journal article supplement (PMC4411949)
Supplement: NIHMS679116-supplement-S1.pdf [file NIHMS679116-supplement-S1.pdf]

## Supplementary Information

Expanding ester biosynthesis in *Escherichia coli*

Gabriel M Rodriguez, Yohei Tashiro and Shota Atsumi\*

Department of Chemistry, University of California, Davis, One Shields Ave, Davis, CA, 95616,  
USA

\*To whom correspondence may be addressed: Email: [satsumi@ucdavis.edu](mailto:satsumi@ucdavis.edu)

### Table of contents

Supplementary Table 1 Genotype of *E. coli* host strains and plasmids used in this study

Supplementary Table 2 Yield of isobutyl acetate from glucose by strain 5

Supplementary Table 3 Degradation test of isobutyl acetate in *E. coli* culture

Supplementary Table 4 Degradation test of isobutyl isobutyrate in *E. coli* culture

Supplementary Table 5 Oligonucleotides used in this study

Supplementary Table 6 Plasmid construction by SLIC

Supplementary Fig. 1 Isobutyl acetate from glucose in strain 5

Supplementary Fig. 2 Effect of isobutyl acetate on *E. coli* growth

Supplementary Fig. 3 Biosynthesis pathway for higher chain ester

Supplementary Fig. 4 Reaction mechanism of KDHC

Supplementary Fig. 5 Functions of Eth1 and Cat as acetyl-CoA transferase

Supplementary Fig. 6 DNA sequence of codon optimized *ATF1* gene

References

**Supplementary Table 1 Genotype of *E. coli* host strains and plasmids used in this study**

| <i>E. coli</i> strain | Genotype                                                                                                                                                                                              | Reference |
|-----------------------|-------------------------------------------------------------------------------------------------------------------------------------------------------------------------------------------------------|-----------|
| BW25113               | <i>rrnB</i> <sub>T14</sub> $\Delta$ <i>lacZ</i> WJ16 <i>hsdR</i> 514 $\Delta$ <i>araBAD</i> <sub>AH33</sub> $\Delta$ <i>rhaBAD</i> <sub>LC78</sub>                                                    | 1         |
| JCL16                 | BW25113/F' [ <i>traD</i> 36, <i>proAB</i> <sup>+</sup> <i>lacI</i> <sup>q</sup> ZAM15 Tn10( <i>tet</i> <sup>r</sup> )]                                                                                | 2         |
| JCL88                 | Same as JCL16 but with $\Delta$ <i>adhE</i> $\Delta$ <i>frd</i> $\Delta$ <i>ldhA</i> $\Delta$ <i>pta</i> $\Delta$ <i>fnr</i>                                                                          | 3         |
| JCL260                | Same as JCL16 but with $\Delta$ <i>adhE</i> $\Delta$ <i>frd</i> - <i>ldhA</i> $\Delta$ <i>pta</i> $\Delta$ <i>pf1B</i> $\Delta$ <i>fnr</i>                                                            | 3         |
| AL704                 | Same as JCL260 but with $\Delta$ <i>yqhD</i> $\Delta$ <i>adhP</i> $\Delta$ <i>eutG</i> $\Delta$ <i>yiaY</i> $\Delta$ <i>yjgB</i> $\Delta$ <i>fucO</i>                                                 | 4         |
| AL1050                | F- $\lambda$ - <i>ilvG</i> - <i>rfb</i> -50 <i>rph</i> -1 <i>lacI</i> <sup>q</sup> <i>tetR</i> <i>spec</i> <sup>R</sup>                                                                               | This work |
| Plasmid Name          | Genotype                                                                                                                                                                                              | Reference |
| pGR03                 | p15A ori; Cm <sup>R</sup> ; <i>P</i> <sub>L</sub> <i>lacO</i> <sub>1</sub> : <i>alsS</i> - <i>ilvCD</i>                                                                                               | 4         |
| pSA40                 | p15A ori; Kan <sup>R</sup> ; <i>P</i> <sub>L</sub> <i>lacO</i> <sub>1</sub> :                                                                                                                         | 2         |
| pSA69                 | p15A ori; Kan <sup>R</sup> ; <i>P</i> <sub>L</sub> <i>lacO</i> <sub>1</sub> : <i>alsS</i> - <i>ilvCD</i>                                                                                              | 3         |
| pSA138                | ColE1 ori; Amp <sup>R</sup> ; <i>P</i> <sub>L</sub> <i>lacO</i> <sub>1</sub> : <i>kivd</i> - <i>yqhD</i>                                                                                              | 3         |
| pZE12-luc             | ColE1 ori; Amp <sup>R</sup> ; <i>P</i> <sub>L</sub> <i>lacO</i> <sub>1</sub> : <i>luc</i>                                                                                                             | 5         |
| pAL495                | p15A ori; Cm <sup>R</sup> ; <i>P</i> <sub>L</sub> <i>lacO</i> <sub>1</sub> : <i>mRFP1</i>                                                                                                             | This work |
| pAL497                | p15A ori; Cm <sup>R</sup> ; <i>P</i> <sub>L</sub> <i>lacO</i> <sub>1</sub> : <i>luxCDE</i>                                                                                                            | This work |
| pAL603                | ColE1 ori; Amp <sup>R</sup> ; <i>P</i> <sub>L</sub> <i>lacO</i> <sub>1</sub> : <i>alsS</i> - <i>ilvCD</i> , <i>P</i> <sub>L</sub> <i>lacO</i> <sub>1</sub> : <i>kivd</i> - <i>adhA</i>                | This work |
| pAL609                | ColE1 ori; Amp <sup>R</sup> ; <i>P</i> <sub>L</sub> <i>lacO</i> <sub>1</sub> : <i>kivd</i> - <i>mhpF</i>                                                                                              | This work |
| pAL622                | ColE1 ori; Kan <sup>R</sup> ; <i>ATF1</i>                                                                                                                                                             | This work |
| pAL633                | ColE1 ori; Amp <sup>R</sup> ; <i>P</i> <sub>L</sub> <i>lacO</i> <sub>1</sub> : <i>bkdA1</i> - <i>bkdA2</i> - <i>bkdB</i> - <i>lpdV</i>                                                                | This work |
| pAL670                | p15A ori; Cm <sup>R</sup> ; <i>P</i> <sub>L</sub> <i>lacO</i> <sub>1</sub> : <i>EHT1</i>                                                                                                              | This work |
| pAL675                | p15A ori; Cm <sup>R</sup> ; <i>P</i> <sub>L</sub> <i>lacO</i> <sub>1</sub> : <i>EEB1</i>                                                                                                              | This work |
| pAL676                | p15A ori; Cm <sup>R</sup> ; <i>P</i> <sub>L</sub> <i>lacO</i> <sub>1</sub> : <i>ATF1</i>                                                                                                              | This work |
| pAL679                | ColE1 ori; Amp <sup>R</sup> ; <i>P</i> <sub>L</sub> <i>lacO</i> <sub>1</sub> : <i>kivd</i> - <i>ATF1</i>                                                                                              | This work |
| pAL682                | p15A ori; Kan <sup>R</sup> ; <i>P</i> <sub>L</sub> <i>lacO</i> <sub>1</sub> : <i>mRFP1</i>                                                                                                            | This work |
| pAL683                | p15A ori; Kan <sup>R</sup> ; <i>P</i> <sub>L</sub> <i>lacO</i> <sub>1</sub> : <i>EEB1</i>                                                                                                             | This work |
| pAL684                | p15A ori; Kan <sup>R</sup> ; <i>P</i> <sub>L</sub> <i>lacO</i> <sub>1</sub> : <i>EHT1</i>                                                                                                             | This work |
| pAL685                | p15A ori; Kan <sup>R</sup> ; <i>P</i> <sub>L</sub> <i>lacO</i> <sub>1</sub> : <i>ATF1</i>                                                                                                             | This work |
| pAL689                | p15A ori; Kan <sup>R</sup> ; <i>P</i> <sub>L</sub> <i>lacO</i> <sub>1</sub> : <i>cat</i>                                                                                                              | This work |
| pAL692                | ColE1 ori; Amp <sup>R</sup> ; <i>P</i> <sub>L</sub> <i>lacO</i> <sub>1</sub> : <i>EHT1</i> , <i>P</i> <sub>L</sub> <i>lacO</i> <sub>1</sub> : <i>bkdA1</i> - <i>bkdA2</i> - <i>bkdB</i> - <i>lpdV</i> | This work |
| pAL693                | ColE1 ori; Amp <sup>R</sup> ; <i>P</i> <sub>L</sub> <i>lacO</i> <sub>1</sub> : <i>cat</i> , <i>P</i> <sub>L</sub> <i>lacO</i> <sub>1</sub> : <i>bkdA1</i> - <i>bkdA2</i> - <i>bkdB</i> - <i>lpdV</i>  | This work |
| pAL723                | ColE1 ori; Kan <sup>R</sup> ; <i>P</i> <sub>L</sub> <i>lacO</i> <sub>1</sub> : <i>ATF1</i>                                                                                                            | This work |

**Supplementary Table 2 Yield of isobutyl acetate from glucose by strain 5**

| <b>Isobutyl acetate<br/>(g l<sup>-1</sup>)</b> | <b>Glucose consumed<br/>(g l<sup>-1</sup>)</b> | <b>Yield<br/>(g Isobutyl acetate/g Glucose)</b> | <b>% of Max<br/>(0.42 g/g)</b> | <b><i>D</i><sub>600</sub> at 96 h</b> |
|------------------------------------------------|------------------------------------------------|-------------------------------------------------|--------------------------------|---------------------------------------|
| 17.2 ± 0.4                                     | 51.6 ± 1.3                                     | 0.334 ± 0.016                                   | 79.6 ± 3.8                     | 6.63 ± 0.22                           |

Errors are s.d. ( $n = 3$ ).

**Supplementary Table 3 Degradation test of isobutyl acetate in *E. coli* culture**

|                 | <b>Isobutyl acetate</b> | <b>Isobutanol</b> |
|-----------------|-------------------------|-------------------|
| <b>No cell</b>  | 99.9 ± 0.031%           | 0.12 ± 0.031%     |
| <b>JCL260</b>   | 99.9 ± 0.023%           | 0.14 ± 0.027%     |
| <b>strain 4</b> | 99.8 ± 0.023%           | 0.22 ± 0.023%     |

Cells were grown in 5 ml M9P with 50 g l<sup>-1</sup> glucose in 15 ml-screw-cap tubes at 37°C until  $D_{600}$  ~0.4, then 1 mM IPTG was added and tubes were transferred to 30°C. Then, 1 h after induction, 1 g l<sup>-1</sup> isobutyl acetate was added. Remaining isobutyl acetate and formation of isobutanol was measured after 24 h by GC-FID analysis. Errors are s.d. ( $n = 3$ ).

**Supplementary Table 4 Degradation test of isobutyl isobutyrate in *E. coli* culture**

|                  | <b>Isobutyl isobutyrate</b> | <b>Isobutanol</b> |
|------------------|-----------------------------|-------------------|
| <b>No cell</b>   | 99.3 ± 0.22%                | 0.7 ± 0.22%       |
| <b>AL704</b>     | 98.8 ± 0.18%                | 1.2 ± 0.18%       |
| <b>strain 9</b>  | 98.5 ± 0.48%                | 1.5 ± 0.48%       |
| <b>strain 16</b> | 97.5 ± 0.48%                | 2.5 ± 0.48%       |
| <b>strain 18</b> | 98.8 ± 0.40%                | 1.2 ± 0.40%       |

Cells were grown in 5 ml M9P with 50 g l<sup>-1</sup> glucose in 15 ml-screw-cap tubes at 37°C until  $D_{600}$  ~0.4, then 1 mM IPTG was added and tubes were transferred to 30°C. Then, 1 h after induction, 1 g l<sup>-1</sup> isobutyl isobutyrate was added. Remaining isobutyl isobutyrate and formation of isobutanol was measured after 24 h by GC-FID analysis. Errors are s.d. ( $n = 3$ ).

**Supplementary Table 5 Oligonucleotides used in this study**

| <b>Name</b> | <b>Sequence</b>                                              |
|-------------|--------------------------------------------------------------|
| GR387       | TCTAGAGGCATCAAATAAAACGAAA                                    |
| GR388       | GTGACCTTTCTCCTGCATGC                                         |
| GR689       | GCATGCAGGAGAAAGGTCACATGAGTAAGCGTAAAGTCGCCATTATC              |
| GR698       | TCTAGAGGCATCAAATAAAACGAAAGGC                                 |
| GR699       | GGTACCTTTCTCCTCTTTAATGAATTCGG                                |
| GR701       | TTTTATTTGATGCCTCTAGATCATGCCGCTTCTCCTGCCTT                    |
| GR720       | GCATGCAGGAGAAAGGTCACATGAACGAAATCGACGAAAAGAATCAAG             |
| GR721       | TTTTATTTGATGCCTCTAGATTACGGACCCAGCAGCAGTG                     |
| GR724       | TTAAAGAGGAGAAAGGTACCATGAACGAGTACGCCCCCTG                     |
| GR725       | TTTTATTTGATGCCTCTAGATCAGATATGCAAGGCGTGGC                     |
| SD67        | GAACGCCGTACGCGAGCGGTATCAGCTCACTCAA                           |
| SD68        | GCCTCGTCTAGGTCTAGGGCGGCGGATTTGTC                             |
| SD69        | CGCCGCCCTAGACCTAGGACGAGGCCCTTTCGTCTTACCTCGAG                 |
| SD70        | GAGCTGATACCGCTCGCGTACGGCGTTCACCGACAAACAACAGAT                |
| YT018       | TAAACGCGTGCTAGAGGCATCAAAT                                    |
| YT040       | CATGGTACCTTTCTCCTCTTTAATGAATTCGGTCA                          |
| YT087       | CATTGTACCTTTCTCCTCTTTAATGAATTC                               |
| YT193       | CATTAAAGAGGAGAAAGGTACCATGGCTTCTCCTCCG                        |
| YT194       | TTATTTGATGCCTCTAGAGTCATTAAGCACCGGTGGAGT                      |
| YT253       | CATTAAAGAGGAGAAAGGTACAATGGAAAAACACTTACCTTTAATAATAAAT         |
| YT255       | ATCGTTTAAACGAACATTTCCCTATTTGTTGGTATTAC                       |
| YT256       | TAAGGAAATGTTTCGTTTAAACGATGCTGAAG                             |
| YT257       | ATTTGATGCCTCTAGCACGCGTTTAGTTGCCTCCTTCACTTCTTAG               |
| YT438       | CATTAAAGAGGAGAAAGGTACAATGTTTCGCTCGGGTACTATCCAAC              |
| YT439       | ATTTGATGCCTCTAGCACGCGTTTATAAACTAACTCATCAAAGCTGCCAAGA         |
| YT440       | CATTAAAGAGGAGAAAGGTACAATGTCAGAAGTTTCCAAATGGCCAG              |
| YT441       | TTTGATGCCTCTAGCACGCGTTTATACGACTAATTCATCAAACCTAGTGAAAAATTCTGC |
| YT442       | CATTAAAGAGGAGAAAGGTACAATGAACGAAATCGACGAAAAGAATCAAG           |
| YT443       | ATTTGATGCCTCTAGCACGCGTTTACGGACCCAGCAGCAGTG                   |
| YT466       | TCTACCAATAAAAAACGCCCGCGAATTGTGAGCGGATAACAATTGACATT           |
| YT467       | GGATTTGTTTCAGAACGCTCGGTTGCCTAGCACGCGTTTATACGACTAATTCATCA     |
| YT468       | GCAACCGAGCGTTTCTGAACAAATC                                    |
| YT469       | CGCCGGGCGTTTTTTTATTGGT                                       |
| YT470       | GAATTCATTAAGAGGAGAAAGGTACAATGGAGAAAAAATCACTGGATATACCACCG     |
| YT471       | ATTTGATGCCTCTAGCACGCGTTTACGCCCCGCCCTGC                       |
| YT479       | GGATTTGTTTCAGAACGCTCGGTTGCCTAGCACGCGTTTACGCCCC               |

**Supplementary Table 6 Plasmid construction by SLIC**

| Plasmid | Vector PCR |          |                       | Insert PCR |          |                                           | Gene of Interest <sup>f</sup> |
|---------|------------|----------|-----------------------|------------|----------|-------------------------------------------|-------------------------------|
|         | Primer 1   | Primer 2 | Template <sup>a</sup> | Primer 1   | Primer 2 | Template                                  |                               |
| pAL495  | YT087      | YT018    | pGR03                 | YT193      | YT194    | BBa_E1010 <sup>b</sup>                    | <i>mRFP1</i>                  |
| pAL497  | YT087      | YT018    | pGR03                 | YT253      | YT255    | gDNA                                      | <i>luxCD</i>                  |
|         |            |          |                       | YT256      | YT257    | <i>V. harveyi</i> <sup>c</sup>            | <i>luxE</i>                   |
| pAL603  | SD67       | SD68     | pSA138                | SD69       | SD70     | pSA69                                     | <i>alsS-ilvCD</i>             |
| pAL609  | GR387      | GR388    | pSA138                | GR689      | GR701    | gDNA<br><i>E. coli</i> JCL16              | <i>mhpF</i>                   |
| pAL633  | GR698      | GR699    | pSA138                | GR724      | GR725    | gDNA<br><i>P. putida</i> g7               | KDHC operon                   |
| pAL670  | YT087      | YT018    | pGR03                 | YT440      | YT441    | gDNA<br><i>S. cerevisiae</i> <sup>d</sup> | <i>EHT1</i>                   |
| pAL675  | YT087      | YT018    | pGR03                 | YT438      | YT439    | gDNA<br><i>S. cerevisiae</i> <sup>d</sup> | <i>EEB1</i>                   |
| pAL676  | YT087      | YT018    | pGR03                 | YT442      | YT443    | pAL622                                    | <i>ATF1</i> <sup>e</sup>      |
| pAL679  | GR387      | GR388    | pSA138                | GR720      | GR721    | pAL622                                    | <i>ATF1</i> <sup>e</sup>      |
| pAL682  | YT087      | YT018    | pSA69                 | YT193      | YT194    | BBa_E1010 <sup>b</sup>                    | <i>mRFP1</i>                  |
| pAL683  | YT087      | YT018    | pSA69                 | YT438      | YT439    | gDNA<br><i>S. cerevisiae</i> <sup>d</sup> | <i>EEB1</i>                   |
| pAL684  | YT087      | YT018    | pSA69                 | YT440      | YT441    | gDNA<br><i>S. cerevisiae</i> <sup>d</sup> | <i>EHT1</i>                   |
| pAL685  | YT087      | YT018    | pSA69                 | YT442      | YT443    | pAL622                                    | <i>ATF1</i> <sup>e</sup>      |
| pAL689  | YT087      | YT018    | pSA69                 | YT470      | YT471    | pGR03                                     | <i>cat</i>                    |
| pAL692  | YT468      | YT467    | pAL633                | YT466      | YT467    | pAL684                                    | <i>EHT1</i>                   |
| pAL693  | YT468      | YT467    | pAL633                | YT466      | YT479    | pAL689                                    | <i>cat</i>                    |
| pAL723  | YT040      | YT018    | pSA40                 | YT442      | YT443    | pAL622                                    | <i>ATF1</i> <sup>e</sup>      |

a. All plasmids and oligonucleotides are listed in Supplementary Table 1 and 5, respectively.

b. BBa\_E1010 sourced from parts.igem.org

c. *Vibrio harveyi* BB120 (ATCC BAA-1116D-5)

d. *Saccharomyces cerevisiae* BY4741 (ATCC 4040004)

e. Codon optimized *ATF1* was synthesized by GenScript USA Inc. (Piscataway, NJ). The sequence is shown in Supplementary Fig. 6.

f. NCBI reference number: *mhpF*, NP\_414885; the KDHC genes (*bkdA1-bkdA2-bkdB-lpdV*), YP\_001266792.1 YP\_001266793.1 YP\_001266794.1 YP\_001266795.1; *EHT1*, NP\_009736.3; *EEB1*, NP\_015230.1; *ATF1*, NP\_015022.3.

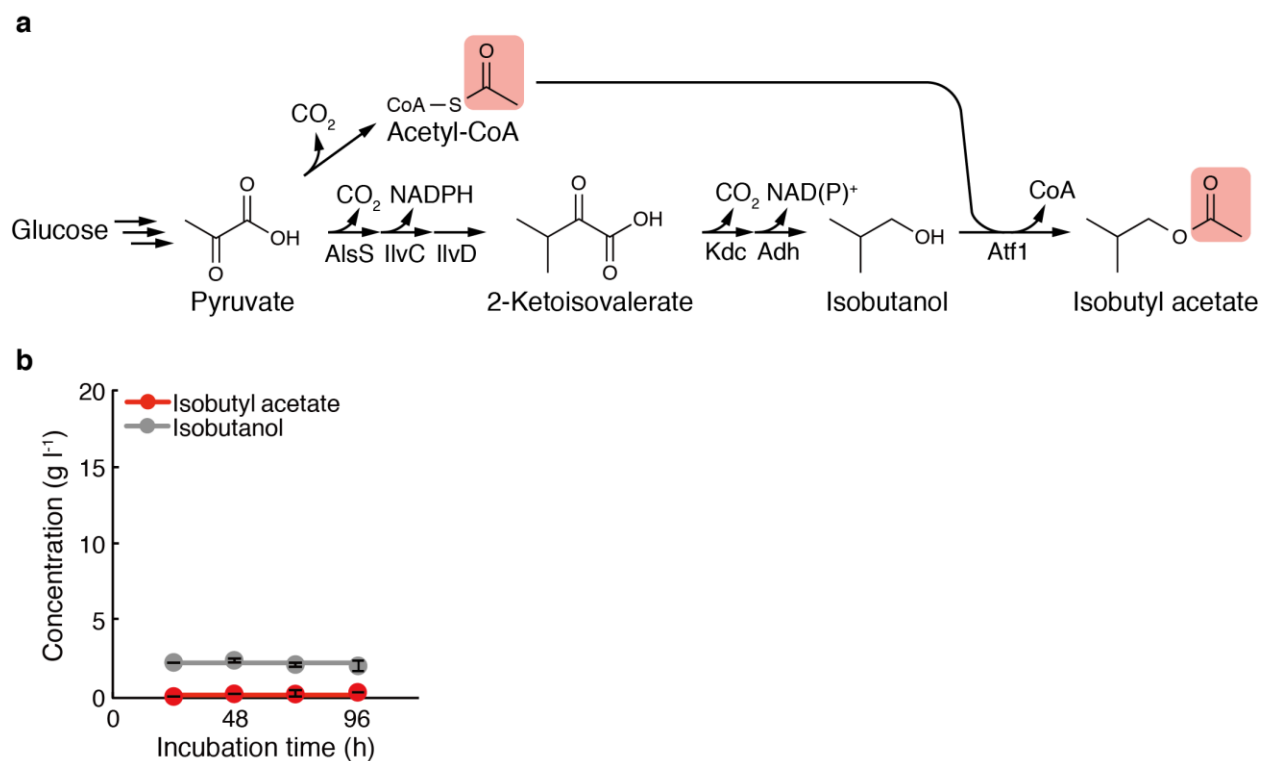

**Supplementary Figure 1. Isobutyl acetate from glucose in strain 5.** (a) Isobutyl acetate synthesis pathway from glucose in *E. coli*. (b) Isobutyl acetate and isobutanol concentrations in culture layer during the production with a hexadecane layer by strain 5. Production of isobutyl acetate from strain 5 grown in M9P containing 50 g l<sup>-1</sup> glucose for 96 h. Cells were grown in 20 ml media in 250 ml screw-cap flasks at 37°C until  $D_{600} \sim 0.4$ , then 1 mM IPTG was added. Hexadecane (20 ml) was added 1 h after induction. Production was performed at 30°C in a rotary shaker at 250 rpm. Errors are s.d. ( $n = 3$ ).



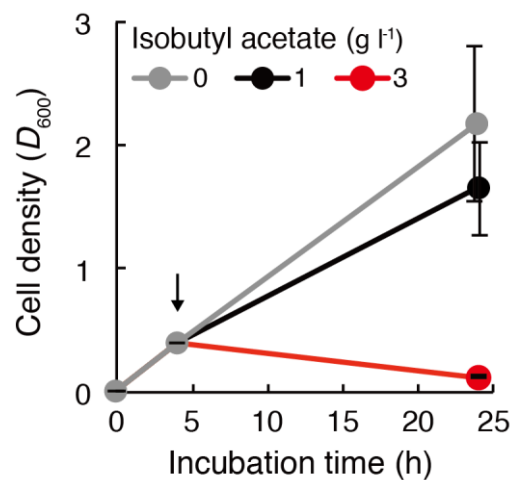

**Supplementary Figure 2. Effect of isobutyl acetate on *E. coli* growth.** JCL260 was grown at 30°C in 5 ml M9P media containing 50 g l<sup>-1</sup> glucose in 15 ml-screw-cap tubes. Black Arrow indicates the time point when isobutyl acetate (None (gray), 1 g l<sup>-1</sup> (black), or 3 g l<sup>-1</sup> (red)) was added into culture. Error bars are s.d. ( $n = 3$ ).

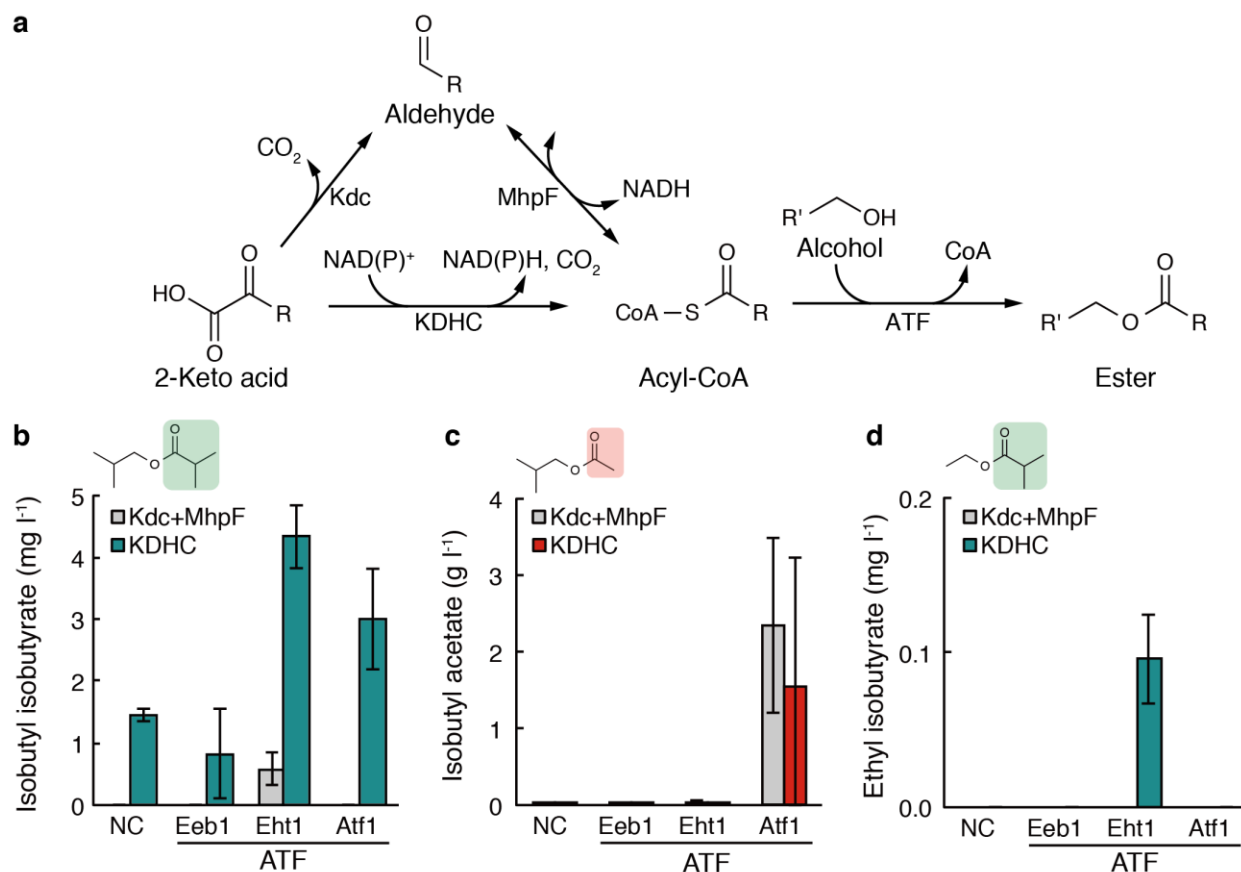

**Supplementary Figure 3. Biosynthesis pathway for higher chain ester.** (a) Higher chain ester pathways from 2-keto acid *via* Kdc-MhpF route and KDHC route. Cells were grown in M9P media containing 10 g l<sup>-1</sup> glucose in 5 ml M9P media in 15 ml-screw-cap tubes at 37°C until  $D_{600} \sim 0.4$ . Then, 1 mM IPTG was added and cultures were transferred to 30°C. After 1 h of induction, 3 g l<sup>-1</sup> 2-ketoisovalerate and 3 g l<sup>-1</sup> of isobutanol were added. Production was performed at 30°C for 24 h. The concentrations of isobutyl isobutyrate (b), isobutyl acetate (c), ethyl isobutyrate (d) in the cultures were measured. Error bars are s.d. ( $n = 3$ ).

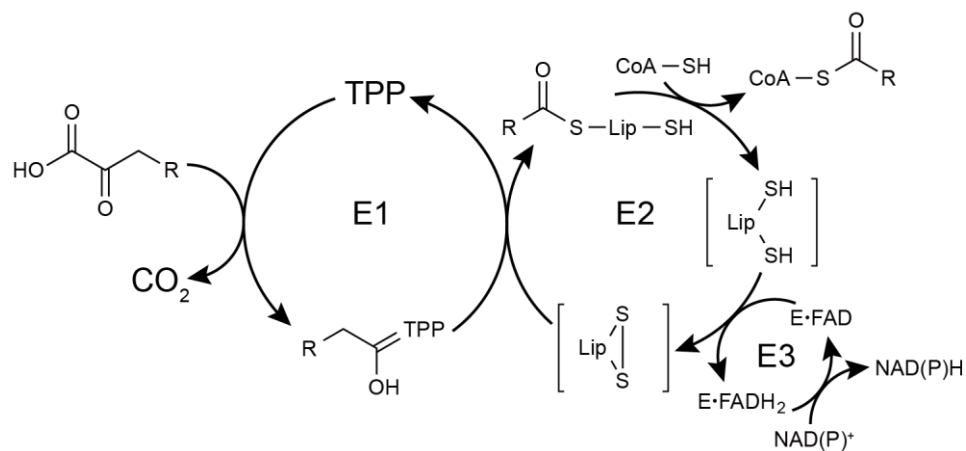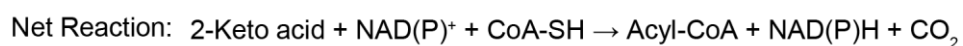

**Supplementary Figure 4. Reaction mechanism of KDHC.** KDHC consists of four proteins. *bkdA1*, *bkdA2*, *bkdB*, and *lpdV* encode  $\alpha$ -subunit (E1),  $\beta$ -subunit (E1), dihydrolipoyl transacylase (E2), and dihydrolipoamide dehydrogenase (E3), respectively. Thiamine diphosphate (TPP), lipoamide-E (Lip), and flavin adenine dinucleotide (FAD) are involved in this reaction as cofactor.

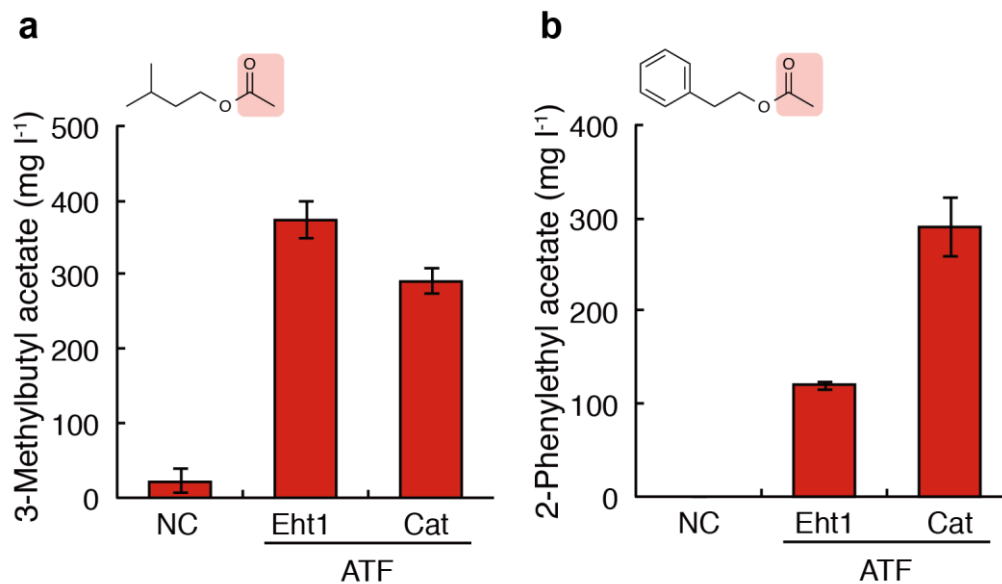

**Supplementary Figure 5. Functions of Eht1 and Cat as acetyl-CoA transferase.** Cells were grown in 5 ml M9P media containing 10 g l<sup>-1</sup> glucose in 15 ml-screw-cap tubes at 37°C until  $D_{600} \sim 0.4$ . Then, 1 mM IPTG was added. After 1 h of induction, 3 g l<sup>-1</sup> 2-ketoisovalerate and 3 g l<sup>-1</sup> 3-methyl-1-butanol (a) or 3 g l<sup>-1</sup> 2-phenylethanol (b) were added and production was performed at 30°C for 24 h at 250 rpm in a rotary shaker. Error bars are s.d. ( $n = 3$ ).

|      |            |             |            |            |             |
|------|------------|-------------|------------|------------|-------------|
| 1    | ATGAACGAAA | TCGACGAAAA  | GAATCAAGCC | CCGGTCCAAC | AAGAATGCCT  |
| 51   | GAAAGAAATG | ATCCAGAATG  | GTCACGCCCG | CCGTATGGGC | TCAGTGGGAA  |
| 101  | ACCTGTATGT | TGCACTGAAC  | CGTCAGAATC | TGTACCGCAA | TTTTTGCACC  |
| 151  | TATGGTGAAC | TGTCGGACTA  | CTGTACGCGT | GATCAACTGA | CCCTGGCTCT  |
| 201  | GCGCGAAATC | TGCCTGAAAA  | ACCCGACGCT | GCTGCATATT | GTGCTGCCGA  |
| 251  | CCCGTTGGCC | GAACCACGAA  | AACTACTACC | GTAGCTCTGA | ATACTACAGT  |
| 301  | CGCCCGCATC | CGGTTACGGA  | TTATATTAGT | GTCCTGCAAG | AACTGAAACT  |
| 351  | GTCCGGCGTG | GTTCTGAATG  | AACAGCCGGA | ATACAGCGCG | GTTATGAAGC  |
| 401  | AAATCCTGGA | AGAATTTAAA  | AACAGCAAGG | GTTCTTACAC | GGCCAAAATC  |
| 451  | TTTAAGCTGA | CCACGACCCT  | GACGATTCCG | TACTTCGGTC | CGACCGGTCC  |
| 501  | GAGCTGGCGC | CTGATCTGCC  | TGCCGGAAGA | ACATACCGAA | AAGTGGGAAGA |
| 551  | AGTTCATCTT | CGTGTCAAAC  | CACTGTATGT | CGGATGGCCG | TAGTTCCATC  |
| 601  | CATTTCTTTC | ACGACCTGCG  | CGATGAACTG | AACAATATCA | AGACCCCGCC  |
| 651  | GAAAAAGCTG | GACTACATCT  | TCAAGTACGA | AGAAGATTAC | CAGCTGCTGC  |
| 701  | GTAAGCTGCC | GGAACCGATT  | GAAAAAGTGA | TCGATTTTCG | TCCGCCGTAC  |
| 751  | CTGTTTATCC | CGAAAAGTCT  | GCTGTCCGGC | TTTATTTACA | ATCATCTGCG  |
| 801  | TTTCTCATCG | AAGGGTGTGT  | GCATGCGCAT | GGATGACGTT | GAAAAACCGG  |
| 851  | ATGACGTCGT | GACCGAAATT  | ATCAACATTA | GCCCGACCGA | ATTTCAGGGC  |
| 901  | ATCAAGGCCA | ACATCAAGTC  | TAACATCCAA | GGCAAATGCA | CGATCACCCC  |
| 951  | GTTTCTGCAT | GTCTGTTGGT  | TCGTGAGCCT | GCACAAATGG | GGCAAGTTTT  |
| 1001 | TCAAACCGCT | GAAC TTTGAA | TGGCTGACGG | ACATTTTCAT | CCCGGCGGAT  |
| 1051 | TGTCGTTCTC | AGCTGCCGGA  | TGACGATGAA | ATGCGTCAAA | TGTATCGCTA  |
| 1101 | CGGCGCCAAT | GTGGGTTTTA  | TCGATTTTAC | CCCGTGGATT | AGTGAATTTG  |
| 1151 | ACATGAACGA | TAACAAGGAA  | AACTTCTGGC | CGCTGATCGA | ACATTATCAC  |
| 1201 | GAAGTTATTT | CCGAAGCGCT  | GCGTAACAAA | AAGCATCTGC | ACGGCCTGGG  |
| 1251 | TTTCAACATC | CAGGGTTTCG  | TTCAAAAGTA | CGTCAACATC | GACAAAGTCA  |
| 1301 | TGTGTGATCG | CGCCATTGGC  | AAACGTCGTG | GCGGCACCCT | GCTGTCCAAC  |
| 1351 | GTTGGTCTGT | TTAATCAGCT  | GGAAGAACCG | GACGCAAAAT | ATTCAATTTG  |
| 1401 | CGATCTGGCT | TTTGGCCAGT  | TCCAAGGTTT | GTGGCATCAG | GCATTCAGCC  |
| 1451 | TGGGCGTCTG | TTCTACGAAC  | GTGAAGGGTA | TGAATATTGT | TGTCGCTTCT  |
| 1501 | ACCAAAAATG | TGGTTGGTAG  | CCAAGAATCG | CTGGAAGAAC | TGTGTAGTAT  |
| 1551 | CTATAAGGCA | CTGCTGCTGG  | GTCCGTAA   |            |             |

**Supplementary Figure 6.** DNA sequence of codon optimized *ATF1* gene

## References

1. Datsenko, K.A. & Wanner, B.L. One-step inactivation of chromosomal genes in *Escherichia coli* K-12 using PCR products. *Proc Natl Acad Sci U S A* **97**, 6640-5 (2000).
2. Atsumi, S. et al. Metabolic engineering of *Escherichia coli* for 1-butanol production. *Metab Eng* **10**, 305-311 (2008).
3. Atsumi, S., Hanai, T. & Liao, J.C. Non-fermentative pathways for synthesis of branched-chain higher alcohols as biofuels. *Nature* **451**, 86-9 (2008).
4. Rodriguez, G.M. & Atsumi, S. Isobutyraldehyde production from *Escherichia coli* by removing aldehyde reductase activity. *Microb Cell Fact* **11**, 90 (2012).
5. Lutz, R. & Bujard, H. Independent and tight regulation of transcriptional units in *Escherichia coli* via the LacR/O, the TetR/O and AraC/I1-I2 regulatory elements. *Nucleic Acids Research* **25**, 1203–1210 (1997).
